# Supplementary material
Source: Springer Nature journal article supplement (https://www.springermedizin.de/resource/supplementary/12913_2006_239_MOESM1_ESM.pdf/9534662)
Supplement: MOESM1 [file 9534662]

## **Unfreeze**

- current ways of doing things are no longer working
- if we don't learn something new, we will fail

## **Change**

- safe circumstances in which to experiment
- opportunities for training and practice
- support and encouragement

## **Refreeze**

- put in supporting mechanisms
- reward
- appraise
- train
